# Supplementary material for: Thyroid transcription factor FOXE1 interacts with ETS factor ELK1 to co-regulate TERT
Source: PubMed Central journal article supplement (PMC5349888; doi:10.18632/oncotarget.13288), 2016-11-11
Supplement: oncotarget-07-85948-s001.pdf [file oncotarget-07-85948-s001.pdf]

## Thyroid transcription factor FOXE1 interacts with ETS factor ELK1 to co-regulate TERT

### Supplementary Materials

#### Full-length ELK1

mdpsvtlwqfllqllreqngghiswtsrdggefklvdaeevarlwglrknktnmny  
 dklsralryyydkniirkvsgqkfvykfsypevagcstedcppqpevsvtstmpnva  
 paaihaapgdtvsgkpgtpkgagmagpgglarssrneymrsglystftiqlqpqp  
 pphprpavvlpnaapagaaappsgsrstspcleaeaeaglpqviltpppeapn  
 lkseelnvepglgralppevkvegpkeeleavagergfvpettkaepevppqegvpa  
 rlpavvmdtagqagghaasspeisqpqkgrkrdlelplspslggpggpertpgsgs  
 gsglqapgpaltpsllptltltpvltlpsllpssihfwstlspiapspaklsfqfpssgsa  
 qvhipsisvdglstpvvlspgpqkp

#### Functional Protein Domains

ETS DNA-Binding domain – aa 1-93

SRF interacting domain (S) – aa 148-168

Repressor domain (R) – aa 230-260

MAPK docking domain (M) – aa 310-334

Trans-activation domain (A) aa 351-399

○ Phosphorylated Serine and Threonine Residues

**Supplementary Figure S1: Amino-acid sequence of the human ELK1 protein.** Previously characterized functional domains and their amino-acid positions are highlighted. Serine and threonine residues known to be phosphorylated are also indicated.

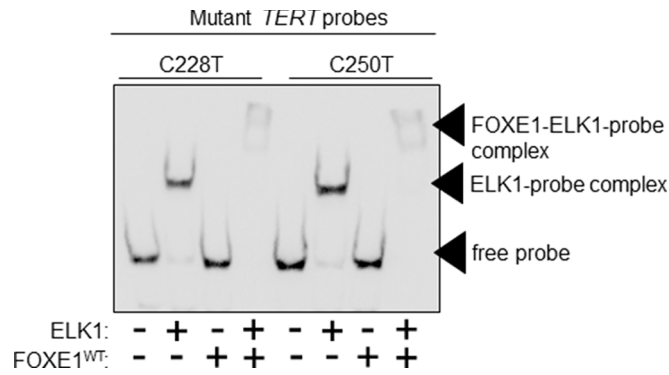

**Supplementary Figure S2: FOXE1 and ELK1 interact with the mutant *TERT* gene promoters.** Varying combinations of purified FOXE1-flag and ELK-HA proteins were incubated with either C228T or C250T *TERT* DNA-probe, resolved on a 6% polyacrylamide gels, and transblotted onto nylon membrane.

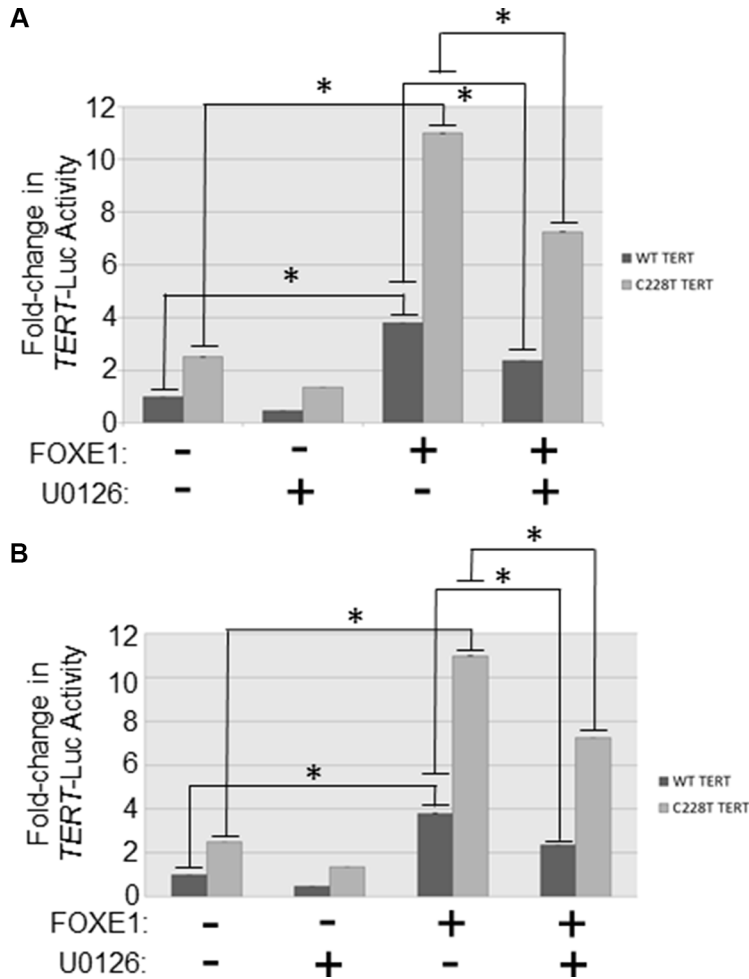

**Supplementary Figure S3: FOXE1 regulates *TERT* transcription in ATC and non-tumorigenic thyroid cells.** (A) SW1736 and (B) NThy cells were transiently transfected with either wild-type or C228T *TERT*-luc, and then different combinations of FOXE1-Flag or empty flag expression plasmids. Twenty-four hours post-transfection the cells were treated for a further 24 hours with 10  $\mu$ M U0126 or vehicle, prior to whole cells lysates being harvested for luciferase reporter assays. Luciferase results are the mean ( $\pm$ SD) of three experiments, both performed in triplicate, expressed as fold increase in luciferase activity relative to empty vector transfected cells. Significant changes are highlighted (\* $p$  < 0.05, Student's *t*-test).

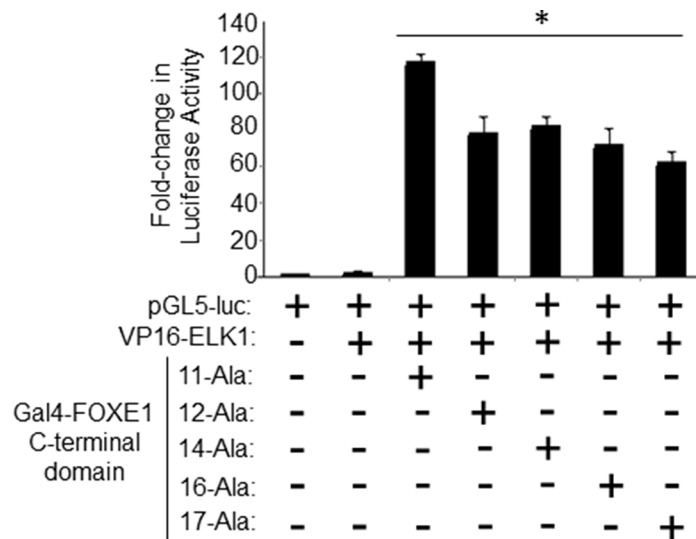

**Supplementary Figure S4: The impact of polyalanine tract length upon FOXE1-ELK1 stimulated promoter activity.**

NThy cells were co-transfected with Gal4-VP16 responsive gene reporter, Gal4-FOXE1 plasmids with varying polyalanine tract size (0-17Ala) and VP16-ELK1. Cell lysates were harvested 48 hrs post-transfection and then reporter assays performed. Values are the the mean ( $\pm$ SD) of three experiments, each performed in triplicate, expressed as fold increase in luciferase activity relative to empty vector transfected cells ( $*p < 0.01$ , One-Way ANOVA).

**Supplementary Table S1: Nucleotide sequences of primers used for PCR cloning and site directed mutagenesis.** For the cloning primers, recognition sequences for EcoRI (GAATTC), BamHI (GGATCC), NotI (GCGGCCGC), XhoI (CTGAG), KpnI (GGTACC) and HindIII (AAGCTT) are underlined. For the mutagenic primers, mutated nucleotide residues are highlighted in bold.

| <b>Cloning Primers</b>   |                                                               |
|--------------------------|---------------------------------------------------------------|
| <b>Name</b>              | <b>Nucleotide Sequence (5' to 3')</b>                         |
| Flag-FOX E1-F            | TAATGAATTCATGACTGCCGAGAGCGGGCCG                               |
| Flag-FOX E1-R            | GACAGGATCCTCACATGGCGGACACGAA                                  |
| HA-ELK1-F                | TAATCTCGAGTTATGGACCCATCTGTGACG                                |
| HA-ELK1-R                | GACAGCGGCCGCTCATGGCTTCTGGGGCCC                                |
| HA-ELK1-205-428-F        | TAATCTCGAGTTGAGGCCTGTCTGGAGGCT                                |
| HA-ELK1-310-428-F        | TAATCTCGAGTTCCGCAGAAGGGCCCGAAG                                |
| HA-ELK1-349-428-F        | TAATCTCGAGTTGGGCCGCGCTGACCCCA                                 |
| HA-ELK1-1-309-R          | GACAGCGGCCGCTCACTGGGAGATCTCAGGGCT                             |
| HA-ELK1-1-349-R          | GACAGCGGCCGCTCACGGCCCCGAGCCTGGAG                              |
| M2H-ELK1-F               | TAATGGATCCGTATGGACCCATCTGTGACG                                |
| M2H-ELK1-R               | GACAGGTACCTCATGGCTTCTGGGGCCC                                  |
| M2H-FOX E1-CTERM-F       | TAATGGATCCGTCCGGCTTACATGCACGACGCG                             |
| M2H-FOX E1-CTERM-R       | GACAGGTACCTCAGTCGTGCATGTAAGCCG                                |
| TERT-LUC-F               | GGGGTACCCTGGCGTCCCTGCACCCTGG                                  |
| TERT-LUC-R               | CCCAAGCTTACGAACGTGGCCAGCGGCAG                                 |
| <b>Mutagenic primers</b> |                                                               |
| Mut-TERT-C228T-F         | CCCCGCCCCGTCCCGACCCCTCCCGGGTCCCCGGCCCAGCCCC <b>T</b> TCCGGG   |
| Mut-TERT-C228T-R         | CCCGGAAGGGGCTGGGCCGGGGACCCGGGAGGGGTCGGGACGGGGCGGGG            |
| Mut-TERT-C250T-F         | CCCCGCCCCGTCCCGACCCCT <b>T</b> CCGGGTCCCCGGCCCAGCCCCCTCCGGG   |
| Mut-TERT-C250T-R         | CCCGGAGGGGGCTGGGCCGGGGACCCGGAAGGGGTCGGGACGGGGCGGGG            |
| Mut-ELK1-S>A-383-F       | CTCCTAGCATTCACTTCTGGAGCACCC <b>TGG</b> CTCCATTGCGCCCCGT       |
| Mut-ELK1-S>A-383-R       | ACGGGGCGCAATGGGAGCCAGGGTGCTCCAGAAGTGAATGCTAGGAG               |
| Mut-ELK1-T>A-353-368-F   | CCGGCGCTGGCCCCATCCCTGCTTCCCTACGCATACATTGGCCCCGGTGCTGCTGGCACCC |
| Mut-ELK1-T>A-353-368-R   | GGGTGCCAGCAGCACCGGGGCCAATGTATGCGTAGGAAGCAGGGATGGGGCCAGCGCCGG  |
| Mut-ELK1-T>A-417-F       | GGCCTCTCGGCCCCCGTGGTGCTCTCCCCAGGGCCCCAGAAGCCATGAGCGGCCGCTGTC  |
| Mut-ELK1-T>A-417-R       | GACAGCGGCCGCTCATGGCTTCTGGGGCCCTGGGGAGAGCACCCAGGGGGCCGAGAGGCC  |
